# Supplementary material for: Hierarchically porous Fe/N–C hollow spheres derived from melamine/Fe-incorporated polydopamine for efficient oxygen reduction reaction electrocatalysis
Source: Royal Society of Chemistry journal article supplement (doi:10.1039/c9se00686a), 2019-01-01
Supplement: c9se00686a1.pdf [file c9se00686a1.pdf]

Electronic Supplementary Information

# Hierarchically porous Fe/N-C hollow spheres derived from melamine/Fe-incorporated polydopamine for efficient oxygen reduction reaction electrocatalysis

Bomin Feng,<sup>ab</sup> Xiuju Wu,<sup>a</sup> Yanli Niu,<sup>a</sup> Wei Li,<sup>a</sup> Yunxi Yao,<sup>\*b</sup> Weihua Hu<sup>\*a</sup> and Chang Ming Li<sup>a</sup>

<sup>a</sup> Institute for Clean Energy & Advanced Materials, School of Materials & Energy,  
Southwest University, Chongqing, China and Chongqing Key Laboratory for  
Advanced Materials and Technologies of Clean Energies, Chongqing 400715, China.

E-mail: [whhu@swu.edu.cn](mailto:whhu@swu.edu.cn) (W. H. Hu)

<sup>b</sup> Institute of Materials, China Academy of Engineering Physics, Mianyang 621908,  
China. E-mail: [yaoyunxi2017@163.com](mailto:yaoyunxi2017@163.com) (Y. X. Yao)

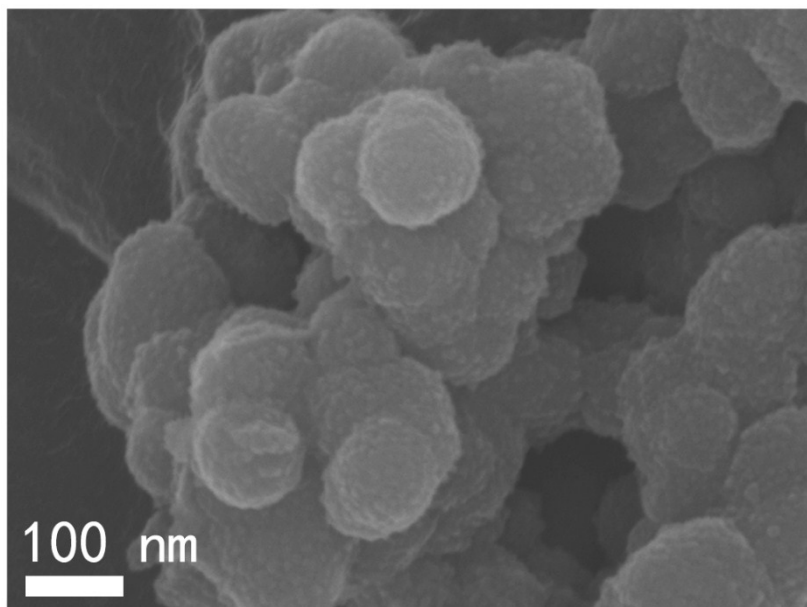

Fig. S1 SEM image of PDA-Fe-melamine precursor.

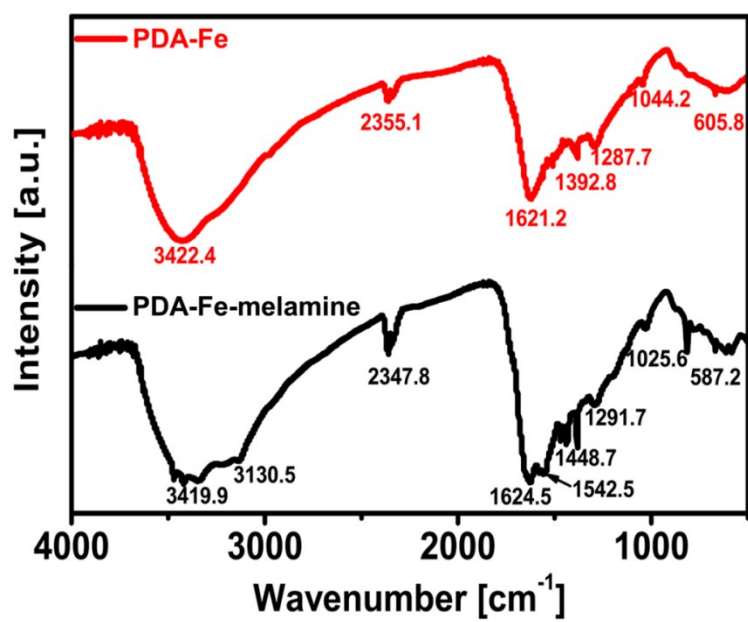

Fig. S2 FTIR spectra of PDA-Fe-melamine precursor and PDA-Fe precursor.

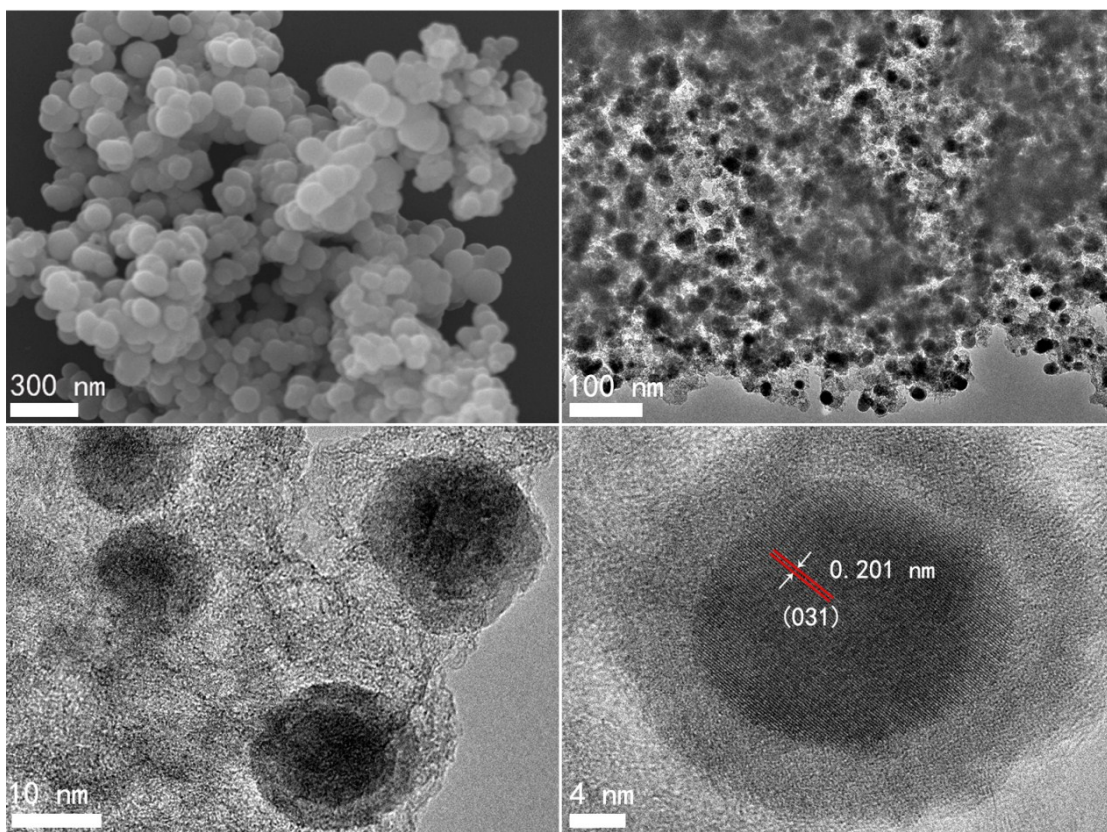

Fig. S3 FESEM and TEM images of  $\text{Fe}_3\text{C}@\text{N-C}$  catalyst synthesized by pyrolysis of PDA-Fe precursor.

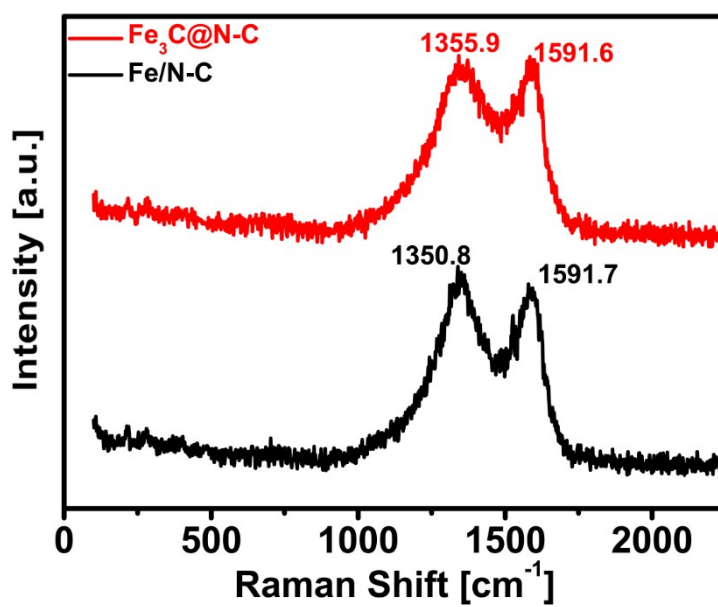

Fig. S4 Raman spectra of Fe/N-C and  $\text{Fe}_3\text{C}@\text{N-C}$  catalyst.

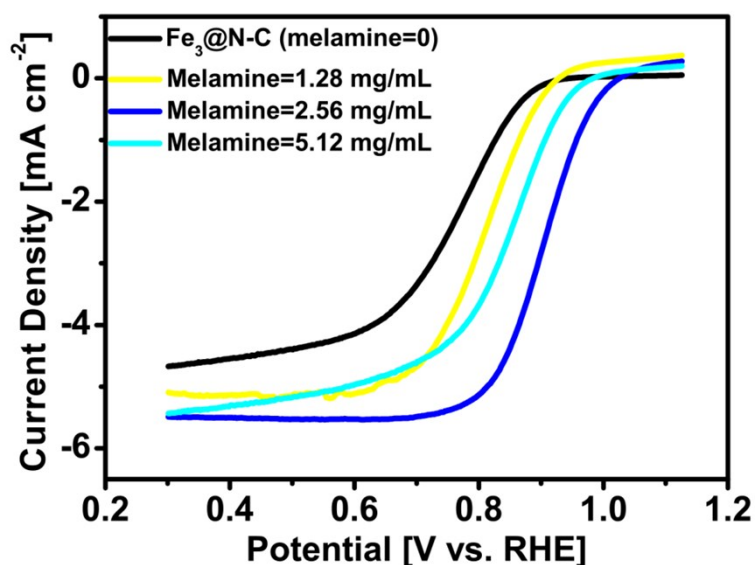

Fig. S5 Optimizing alkaline ORR activity of Fe/N-C catalysts by changing the dosage of melamine. LSV curves of a batch of Fe/N-C catalysts synthesized with different concentration of melamine at 0, 1.28, 2.56 and 5.12 mg mL<sup>-1</sup>, respectively. (Other parameters remain constant including DA=1.28 mg mL<sup>-1</sup>, Fe concentration=1 mM, pyrolysis at 800 °C. LSV curves measured in O<sub>2</sub>-saturated 0.1 M KOH, scan rate: 10 mV s<sup>-1</sup>, rotation rate: 1600 rpm).

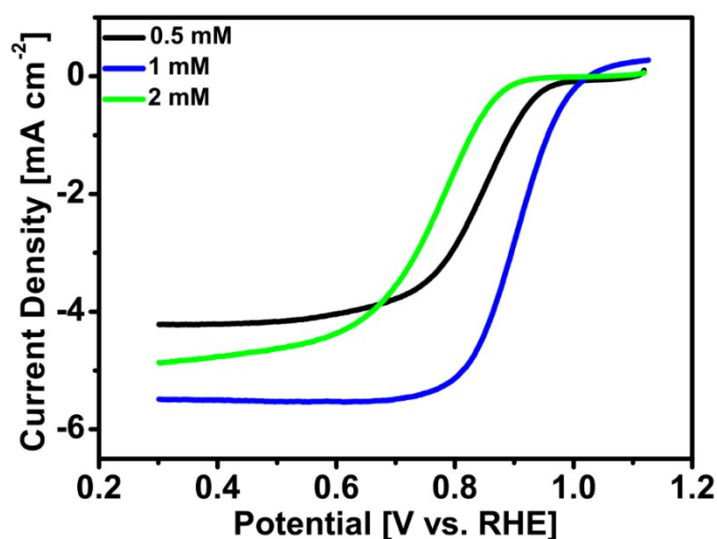

Fig. S6 Optimizing alkaline ORR activity of Fe/N-C catalysts by changing the dosage of Fe<sup>3+</sup> concentration from 0.5 to 2.0 mM. (Other parameters remain constant including DA=1.28 mg mL<sup>-1</sup>, melamine concentration=2.56 mg mL<sup>-1</sup>, pyrolysis at 800 °C. LSV curves measured in O<sub>2</sub>-saturated 0.1 M KOH, scan rate: 10 mV s<sup>-1</sup>, rotation rate: 1600 rpm).

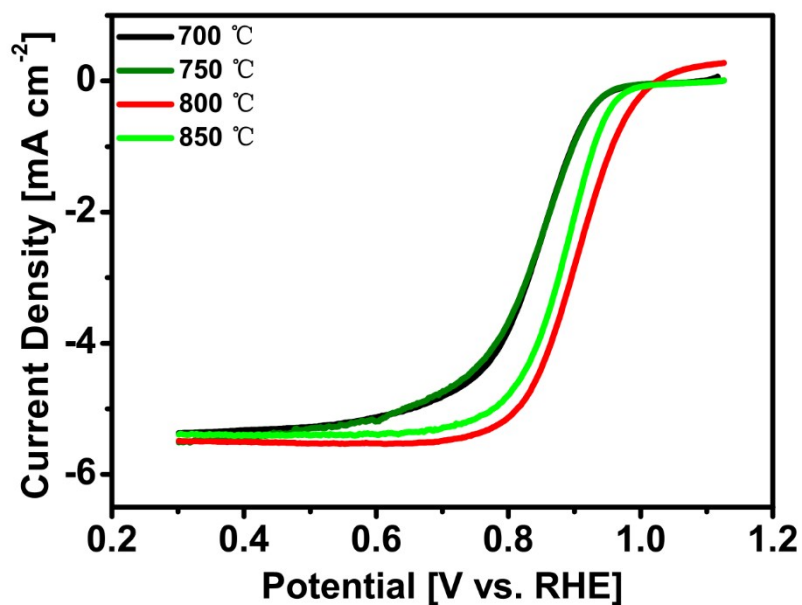

Fig. S7 Optimizing alkaline ORR activity of Fe/N-C catalysts by changing the pyrolysis temperature. (Other parameters remain constant including DA=1.28 mg mL<sup>-1</sup>, melamine concentration=2.56 mg mL<sup>-1</sup>, Fe<sup>3+</sup> concentration 1.0 mM. LSV curves measured in O<sub>2</sub>-saturated 0.1 M KOH, scan rate: 10 mV s<sup>-1</sup>, rotation rate: 1600 rpm).

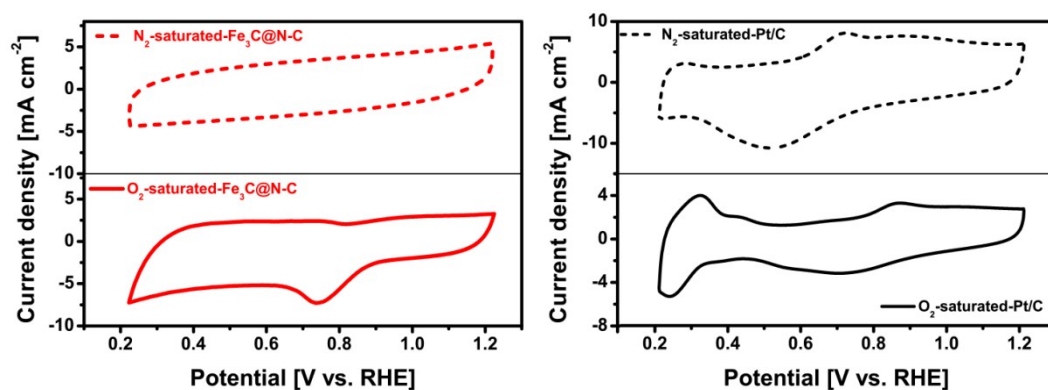

Fig. S8 CV curves of Fe<sub>3</sub>C/N-C catalyst and Pt/C catalyst measured in O<sub>2</sub>-saturated and N<sub>2</sub>-saturated 0.1 M KOH, scan rate: 100 mV s<sup>-1</sup>.

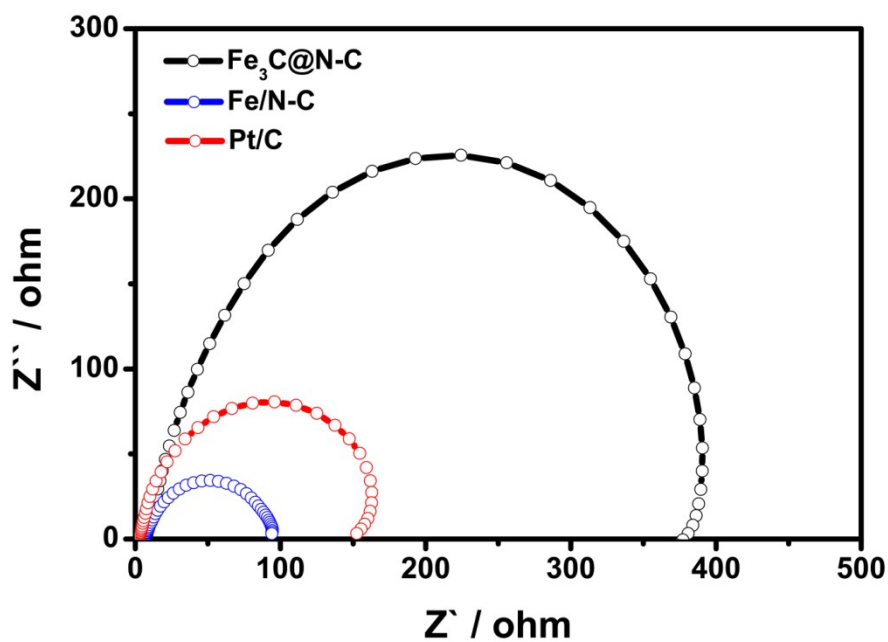

Fig. S9 EIS curves of Fe/N-C, Fe<sub>3</sub>C/N-C and Pt/C catalysts measured in O<sub>2</sub>-saturated 0.1 M KOH. (Applied potential: 0.95 V vs. RHE, amplitude of AC signal perturbation: 5 mV, frequency range: 100 kHz to 10 mHz).

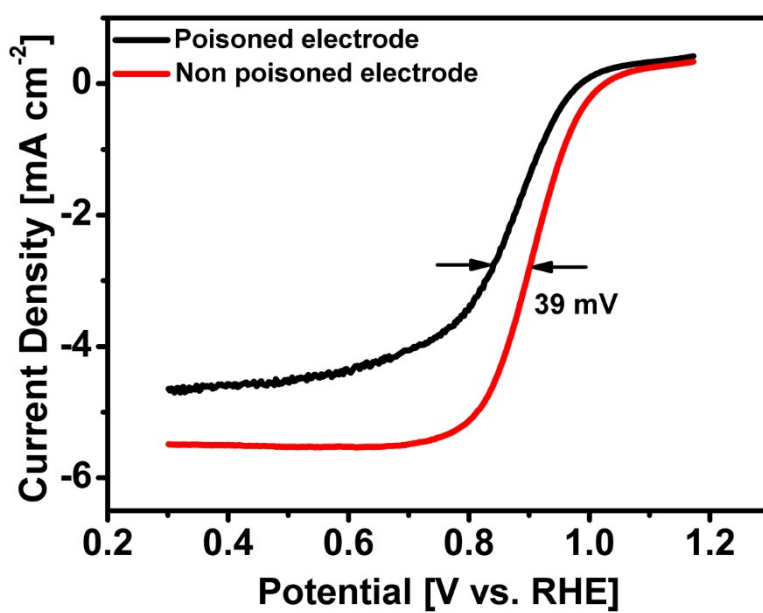

Fig. S10 Alkaline ORR activity of Fe/N-C catalysts before and after immersing in 10 mM KSCN for 1 h. (Electrolytes: O<sub>2</sub>-saturated 0.1 M KOH, scan rate: 10 mV s<sup>-1</sup>, rotation rate: 1600 rpm).

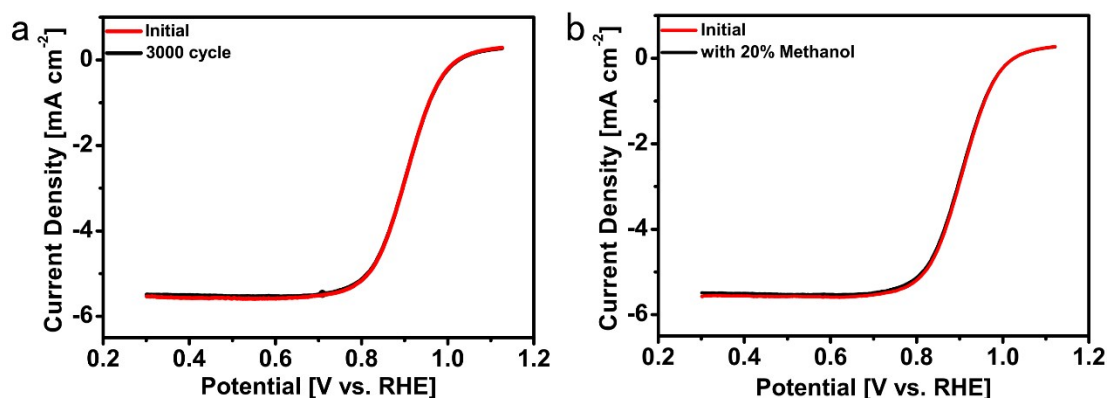

Fig. S11 (a) LSV curves of Fe/N-C before and after 3000-cycle ADT. (b) LSV curves with and without 20 % methanol (v/v). (Electrolytes: O<sub>2</sub>-saturated 0.1 M KOH, scan rate: 10 mV s<sup>-1</sup>, rotation rate: 1600 rpm).

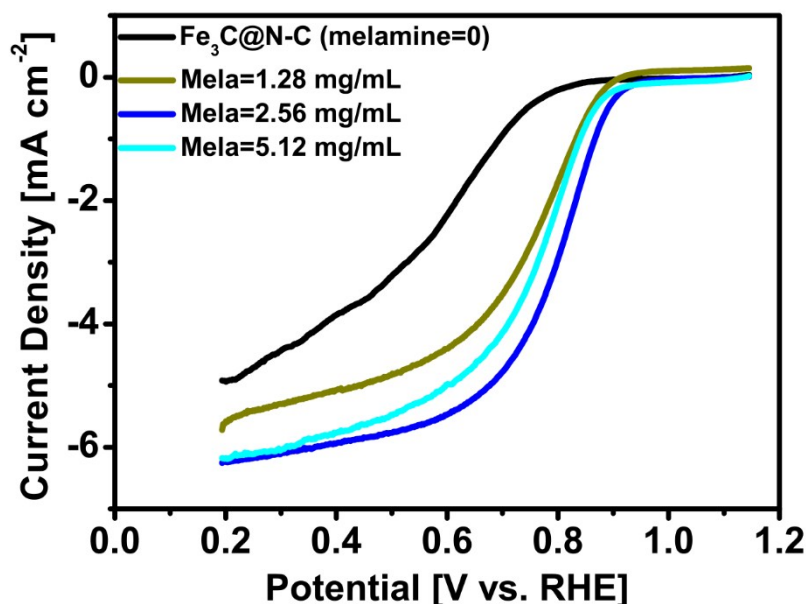

Fig. S12 Optimizing acidic ORR activity of Fe/N-C catalysts by changing the dosage of melamine. LSV curves of a batch of Fe/N-C catalysts synthesized with different concentration of melamine at 0, 1.28, 2.56 and 5.12 mg mL<sup>-1</sup>, respectively. (Other parameters remain constant including DA=1.28 mg mL<sup>-1</sup>, Fe concentration=1 mM, pyrolysis at 800 °C. LSV curves measured in O<sub>2</sub>-saturated 0.1 M HClO<sub>4</sub>, scan rate: 10 mV s<sup>-1</sup>, rotation rate: 1600 rpm).

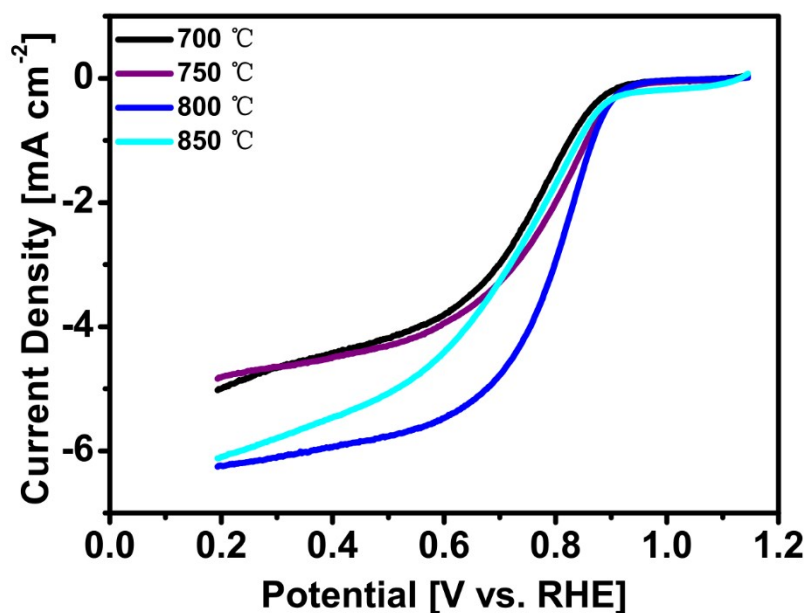

Fig. S13 Optimizing acidic ORR activity of Fe/N-C catalysts by changing the pyrolysis temperature. (Other parameters remain constant including DA=1.28 mg mL<sup>-1</sup>, melamine concentration=2.56 mg mL<sup>-1</sup>, Fe<sup>3+</sup> concentration 1.0 mM. LSV curves measured in O<sub>2</sub>-saturated 0.1 M HClO<sub>4</sub>, scan rate: 10 mV s<sup>-1</sup>, rotation rate: 1600 rpm). (Electrolytes: O<sub>2</sub>-saturated 0.1 M HClO<sub>4</sub>, scan rate: 10 mV s<sup>-1</sup>, rotation rate: 1600 rpm).

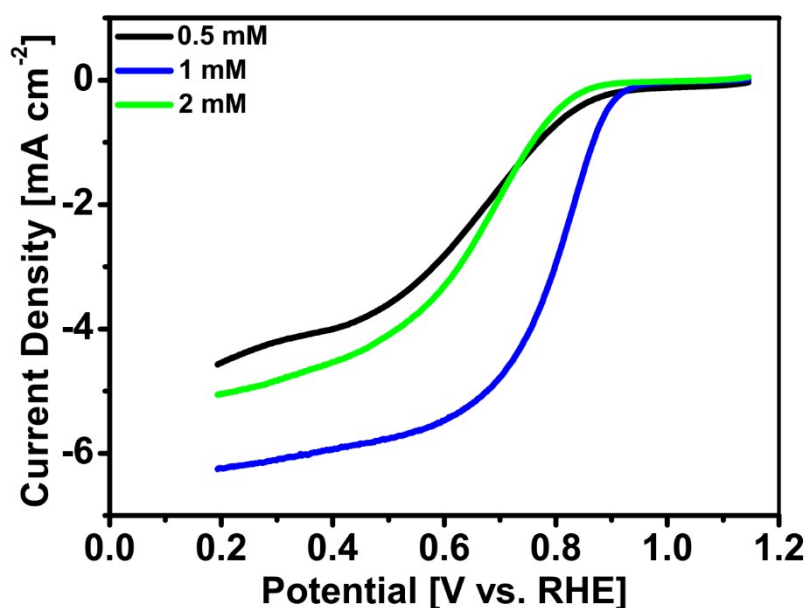

Fig. S14 Optimizing acid ORR activity of Fe/N-C catalysts by changing the dosage of Fe<sup>3+</sup> concentration from 0.5 to 2.0 mM. (Other parameters remain constant including



DA=1.28 mg mL<sup>-1</sup>, melamine concentration=2.56 mg mL<sup>-1</sup>, pyrolysis at 800 °C. LSV curves measured in O<sub>2</sub>-saturated 0.1 M HClO<sub>4</sub>, scan rate: 10 mV s<sup>-1</sup>, rotation rate: 1600 rpm).

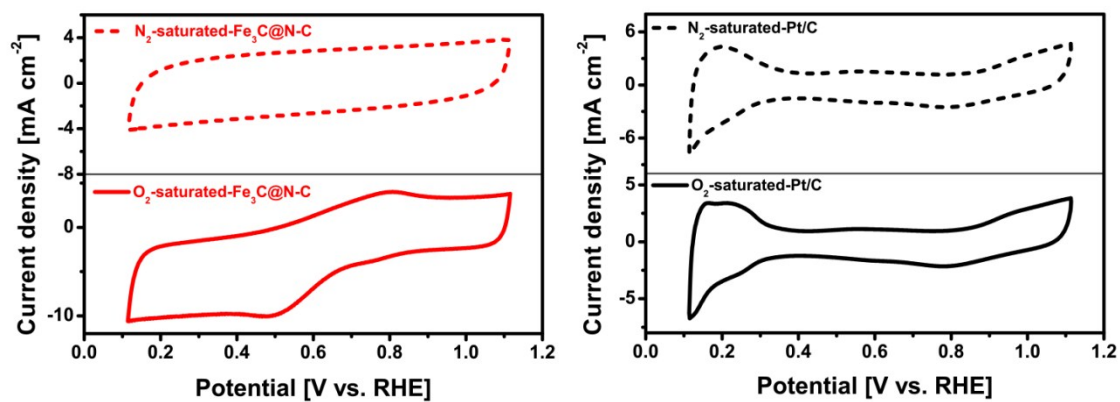

Fig. S15 CV curves of Fe<sub>3</sub>C/N-C catalyst and Pt/C catalyst measured in O<sub>2</sub>-saturated and N<sub>2</sub>-saturated 0.1 M HClO<sub>4</sub>, scan rate: 100 mV s<sup>-1</sup>.

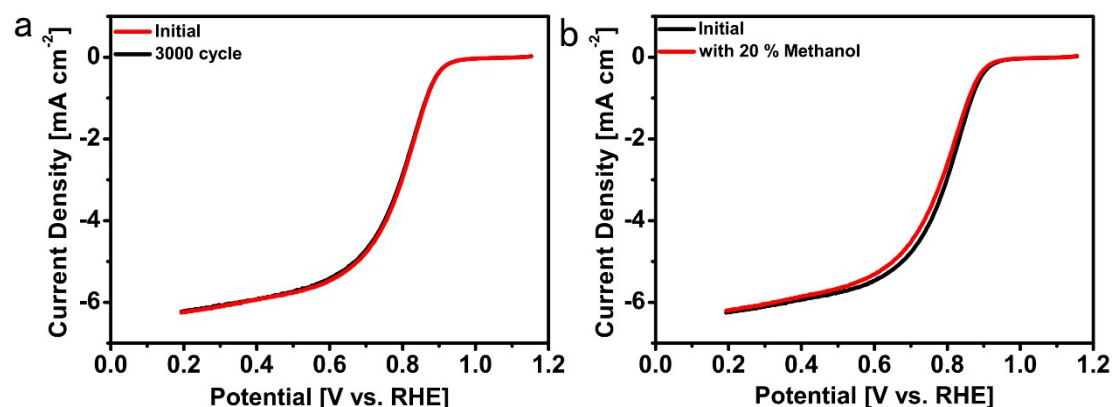

Fig. S16 (a) LSV curves of Fe/N-C catalyst before and after 3000-cycle ADT. (b) LSV curves with and without 20 % methanol (v/v). (Electrolytes: O<sub>2</sub>-saturated 0.1 M HClO<sub>4</sub>, scan rate: 10 mV s<sup>-1</sup>, rotation rate: 1600 rpm).

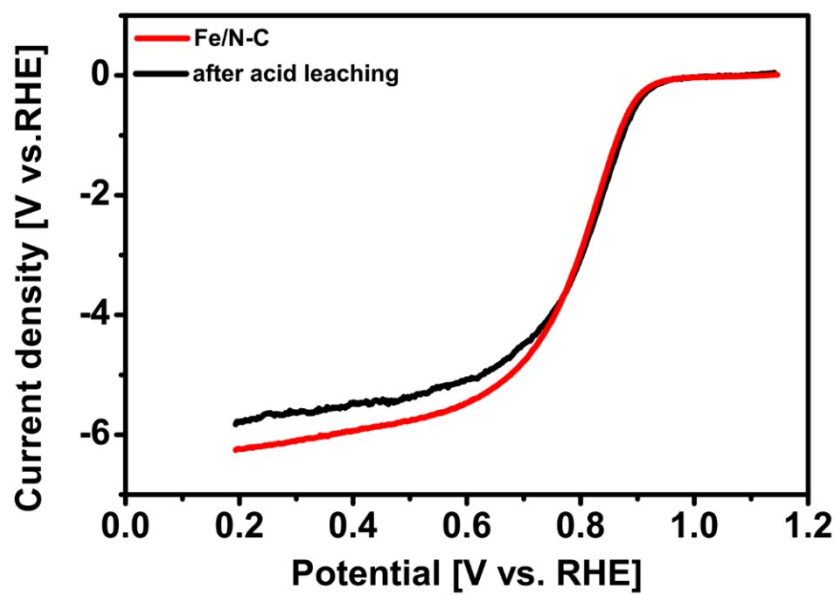

Fig. S17 (a) LSV curves of Fe/N-C catalyst before and after acid leaching and the second heat-treatment. (Electrolytes: O<sub>2</sub>-saturated 0.1 M HClO<sub>4</sub>, scan rate: 10 mV s<sup>-1</sup>, rotation rate: 1600 rpm).

**Table S1.** ORR activity of Fe/N-C catalysts in alkaline media reported in recent literature.

| Catalyst                        | Medium    | $E_{1/2}$ (V vs. NHE) | $\Delta E_{1/2}$<br>(mV, relative to Pt/C) | n         | Max<br>$H_2O_2$ (%) | Ref.      |
|---------------------------------|-----------|-----------------------|--------------------------------------------|-----------|---------------------|-----------|
| Fe-N/C                          | 0.1 M KOH | 0.915                 | +45                                        | 3.81-3.99 | 5                   | This work |
| <b>3D-Fe-N-CNS</b>              | 0.1 M KOH | 0.88                  | +20                                        | 3.83-3.95 | -                   | [1]       |
| <b>Fe-ISAs/CN</b>               | 0.1 M KOH | 0.9                   | +58                                        | 3.9       | 5                   | [2]       |
| <b>Fe/SNC</b>                   | 0.1 M KOH | 0.79                  | +40                                        |           |                     | [3]       |
| <b>Fe-N/C-800</b>               | 0.1 M KOH | 0.81                  | -                                          | 3.97      | 5                   | [4]       |
| <b>Fe SAC/N-C</b>               | 0.1 M KOH | 0.89                  | +40                                        | 4         | 2                   | [5]       |
| <b>SA-Fe-HPC</b>                | 0.1 M KOH | 0.89                  | +50                                        | 4         | 2.5                 | [6]       |
| <b>Fe-N-SCCF*</b>               | 0.1 M KOH | 0.883                 | -                                          | 3.9-4     | 5                   | [7]       |
| <b>Fe<sub>50</sub>-N-C-900*</b> | 0.1 M KOH | 0.92                  | +70                                        | 3.95      | 10                  | [8]       |
| <b>FeGH-ArNH3</b>               | 0.1 M KOH | -                     | -27                                        | 3.95      | 5.6                 | [9]       |
| <b>Fe/N/C</b>                   | 0.1 M KOH | 0.84                  | 0                                          | 3.96      | -                   | [10]      |
| <b>Fe SAs-N/C-20</b>            | 0.1 M KOH | 0.909                 | +59                                        | 3.8       | -                   | [11]      |
| <b>Fe@Aza-PON</b>               | 0.1 M KOH | -                     | +13                                        | 3.7       | 15                  | [12]      |
| <b>N-Fe-CNT/CNP</b>             | 0.1M NaOH | 0.93                  | +20                                        | 3.92      | -                   | [13]      |
| <b>SA-Fe/NG</b>                 | 0.1 M KOH | 0.88                  | +30                                        | 3.87-3.96 | 8.6                 | [14]      |
| <b>Fe@C-FeNCs</b>               | 0.1 M KOH | 0.899                 | +15                                        | 3.95-3.99 | 2.5                 | [15]      |
| <b>Fe-N/C-700*</b>              | 0.1 M KOH | 0.84                  | +5                                         | 4.02      | 3                   | [16]      |
| <b>Fe-N-CC</b>                  | 0.1 M KOH | 0.83                  | +50                                        | 3.7       | 10                  | [17]      |
| <b>Fe<sub>SA</sub>-N-C*</b>     | 0.1 M KOH | 0.891                 | +43                                        | 4         | 5.5                 | [18]      |
| <b>Fe-N-S*</b>                  | 0.1 M KOH | 0.91                  | +60                                        | 4         | 2                   | [19]      |
| <b>Fe@NC-800*</b>               | 0.1 M KOH | 0.81                  | +40                                        | 3.98      | 3.55                | [20]      |

|                                |           |       |     |           |     |      |
|--------------------------------|-----------|-------|-----|-----------|-----|------|
| <b>Fe/Fe<sub>3</sub>C@N-C*</b> | 0.1 M KOH | 0.804 | -16 | 4.08-4.15 | 3.5 | [21] |
| <b>Fe-N-C*</b>                 | 1 M NaOH  | 0.9   | +20 | 3.9       | -   | [22] |
| <b>Fe-N-C900*</b>              | 0.1 M KOH | 0.91  | +32 | 3.988     | 2.5 | [23] |
| <b>CNT@f-FeNC170*</b>          | 0.1 M KOH | 0.84  | 0   |           |     | [24] |
| <b>SC-Fe*</b>                  | 0.1 M KOH | 0.869 | -   | 3.7       | -   | [25] |
| <b>C-FeHZ8@g-C3N4-950*</b>     | 0.1 M KOH | -     | +30 | 3.96      | -   | [26] |
| <b>Fe@N-CNTs@rGO *</b>         | 0.1 M KOH | 0.83  | 0   | 4.1       | 7   | [27] |

**Table S2.** ORR activity of Fe/N-C catalysts in acidic media reported in recent literature.

| <b>Catalyst</b>       | <b>Medium</b>                        | <b>E<sub>1/2</sub> (V vs. NHE)</b> | <b>ΔE<sub>1/2</sub><br/>(mV, relative to Pt/C)</b> | <b>n</b>  | <b>Max H<sub>2</sub>O<sub>2</sub> (%)</b> | <b>Ref.</b> |
|-----------------------|--------------------------------------|------------------------------------|----------------------------------------------------|-----------|-------------------------------------------|-------------|
| <b>Fe-N/C</b>         | 0.1 M HClO <sub>4</sub>              | 0.810                              | -55                                                | >3.95     | 2                                         | This work   |
| <b>C-Fe-Z8-Ar*</b>    | 0.1 M HClO <sub>4</sub>              | 0.82                               | -40                                                | 3.98      | 1                                         | [28]        |
| <b>FeCo-NC</b>        | 0.1 M HClO <sub>4</sub>              | 0.74                               | -                                                  | 3.9       | -                                         | [29]        |
| <b>Fe-ISAs/CN</b>     | 0.1 M HClO <sub>4</sub>              | -                                  | -90                                                | -         | -                                         | [2]         |
| <b>Fe/SNC</b>         | 0.5 M H <sub>2</sub> SO <sub>4</sub> | 0.77                               | -50                                                | 3.9       | 6                                         | [3]         |
| <b>SA-Fe-HPC</b>      | 0.1 M HClO <sub>4</sub>              | 0.81                               | -30                                                | 3.9       | -                                         | [6]         |
| <b>Fe-g-C3N4@C</b>    | 0.1 M HClO <sub>4</sub>              | 0.75                               | -                                                  | 3.95      | 2.6                                       | [30]        |
| <b>Fe-NMCS</b>        | 0.1 M HClO <sub>4</sub>              | -                                  | -59                                                | 3.92-3.94 | 6                                         | [31]        |
| <b>Fe/N/S-PCNTs</b>   | 0.5 M H <sub>2</sub> SO <sub>4</sub> | 0.62                               | -14                                                | 3.84      | -                                         | [32]        |
| <b>PmPDAFeNx/C</b>    | 0.1 M H <sub>2</sub> SO <sub>4</sub> | 0.82                               | -65                                                | -         | 1.5                                       | [33]        |
| <b>(CM+PANI)-Fe-C</b> | 0.5 M H <sub>2</sub> SO <sub>4</sub> | 0.8                                | -                                                  | 3.95      | 2.5                                       | [11]        |
| <b>Fe/N/C-SCN</b>     | 0.1 M H <sub>2</sub> SO <sub>4</sub> | 0.836                              | -48                                                | -         | 1.5                                       | [34]        |
| <b>Fe-N-C/VA-CNT</b>  | 0.5 M H <sub>2</sub> SO <sub>4</sub> | 0.79                               | -                                                  | 3.92-3.98 | 1-5                                       | [35]        |

|                        |                                      |       |      |           |   |      |
|------------------------|--------------------------------------|-------|------|-----------|---|------|
| SA-Fe/NG               | 0.1 M HClO <sub>4</sub>              | 0.8   | -30  | 3.95      | 5 | [14] |
| Fe-N/C-700*            | 0.1 M HClO <sub>4</sub>              | -     | -18  | 3.98      | 5 | [16] |
| Fe-N-CC*               | 0.5 M H <sub>2</sub> SO <sub>4</sub> | 0.56  | -80  | 3.8       | 8 | [17] |
| Fe <sub>SA</sub> -N-C* | 0.1 M HClO <sub>4</sub>              | 0.776 | -5   | 4         | 1 | [18] |
| Fe-N-S*                | 0.5 M H <sub>2</sub> SO <sub>4</sub> | 0.78  | -15  | 4         | 1 | [19] |
| Fe@NC-800*             | 0.5 M H <sub>2</sub> SO <sub>4</sub> | 0.58  | -140 | 3.74      | - | [20] |
| Fe-N-C900              | 0.5 M H <sub>2</sub> SO <sub>4</sub> | 0.80  | -    | 3.955     | 2 | [23] |
| CNT-Fe/NHCNS           | 0.1 M HClO <sub>4</sub>              | 0.84  | +20  | 3.93-3.98 | 2 | [36] |
| C-FeHZ8@g-C3N4-950*    | 0.1 M HClO <sub>4</sub>              | -     | -60  | 3.7       | - | [26] |

## Reference

- [1] G. Wan, M. Ma, A. Jia, L. Chen, Y. Chen, X. Cui, H. Chen, J. Shi, *Journal of Materials Chemistry A* **2016**, *4*, 11625-11629.
- [2] Y. Chen, S. Ji, Y. Wang, J. Dong, W. Chen, Z. Li, R. Shen, L. Zheng, Z. Zhuang, D. Wang, Y. Li, *Angew Chem Int Ed Engl* **2017**, *56*, 6937-6941.
- [3] H. Shen, E. Gracia-Espino, J. Ma, K. Zang, J. Luo, L. Wang, S. Gao, X. Mamat, G. Hu, T. Wagberg, S. Guo, *Angew Chem Int Ed Engl* **2017**, *56*, 13800-13804.
- [4] W. Niu, L. Li, X. Liu, N. Wang, J. Liu, W. Zhou, Z. Tang, S. Chen, *J Am Chem Soc* **2015**, *137*, 5555-5562.
- [5] Y. Lin, P. Liu, E. Velasco, G. Yao, Z. Tian, L. Zhang, L. Chen, *Adv Mater* **2019**, *31*, e1808193.
- [6] Z. Zhang, J. Sun, F. Wang, L. Dai, *Angew Chem Int Ed Engl* **2018**, *57*, 9038-9043.
- [7] B. Wang, X. Wang, J. Zou, Y. Yan, S. Xie, G. Hu, Y. Li, A. Dong, *Nano Lett* **2017**, *17*, 2003-2009.
- [8] S. Fu, C. Zhu, D. Su, J. Song, S. Yao, S. Feng, M. H. Engelhard, D. Du, Y. Lin, *Small* **2018**, 1703118.
- [9] M. Wang, Y. Yang, X. Liu, Z. Pu, Z. Kou, P. Zhu, S. Mu, *Nanoscale* **2017**, *9*, 7641-7649.
- [10] Y. Yu, D. Xiao, J. Ma, C. Chen, K. Li, J. Ma, Y. Liao, L. Zheng, X. Zuo, *RSC Advances* **2018**, *8*, 24509-24516.
- [11] R. Jiang, L. Li, T. Sheng, G. Hu, Y. Chen, L. Wang, *Journal of the American Chemical Society* **2018**, *140*, 11594-11598.
- [12] S.-J. Kim, J. Mahmood, C. Kim, G.-F. Han, S.-W. Kim, S.-M. Jung, G. Zhu, J. J. De Yoreo, G. Kim, J.-B. Baek, *Journal of the American Chemical Society* **2018**, *140*, 1737-1742.

- [13] H. T. Chung, J. H. Won, P. Zelenay, *Nat Commun* **2013**, *4*, 1922.
- [14] L. Yang, C. D, X. H, Z. X, W. X, S. J, X. Z, C. D, *Proceedings of the National Academy of Sciences of the United States of America* **2018**, *115*, 6626.
- [15] W. J. Jiang, L. Gu, L. Li, Y. Zhang, X. Zhang, L. J. Zhang, J. Q. Wang, J. S. Hu, Z. Wei, L. J. Wan, *J Am Chem Soc* **2016**, *138*, 3570-3578.
- [16] Z. K. Yang, L. Lin, A. W. Xu, *Small* **2016**, *12*, 5710-5719.
- [17] G. A. Ferrero, K. Preuss, A. Marinovic, A. B. Jorge, N. Mansor, D. J. L. Brett, A. B. Fuertes, M. Sevilla, M.-M. Titirici, *ACS Nano* **2016**, *10*, 5922-5932.
- [18] L. Jiao, G. Wan, R. Zhang, H. Zhou, S. H. Yu, H. L. Jiang, *Angewandte Chemie International Edition* **2018**, *57*, 8525-8529.
- [19] H. Jin, H. Zhou, D. He, Z. Wang, Q. Wu, Q. Liang, S. Liu, S. Mu, *Applied Catalysis B: Environmental* **2019**, *250*, 143-149.
- [20] L. Zhang, C. Qi, A. Zhao, G. Xu, J. Xu, L. Zhang, C. Zhang, D. Jia, *Applied Surface Science* **2018**, *445*, 462-470.
- [21] C. Song, S. Wu, X. Shen, X. Miao, Z. Ji, A. Yuan, K. Xu, M. Liu, X. Xie, L. Kong, G. Zhu, S. Ali Shah, *J Colloid Interface Sci* **2018**, *524*, 93-101.
- [22]
- [23] D. Lyu, Y. B. Mollamahale, S. Huang, P. Zhu, X. Zhang, Y. Du, S. Wang, M. Qing, Z. Q. Tian, P. K. Shen, *Journal of Catalysis* **2018**, *368*, 279-290.
- [24] G. Zhang, Y. Jia, C. Zhang, X. Xiong, K. Sun, R. Chen, W. Chen, Y. Kuang, L. Zheng, H. Tang, W. Liu, J. Liu, X. Sun, W.-F. Lin, H. Dai, *Energy & Environmental Science* **2019**, *12*, 1317-1325.
- [25] J. Xie, B. Q. Li, H. J. Peng, Y. W. Song, J. X. Li, Z. W. Zhang, Q. Zhang, *Angew Chem Int Ed Engl* **2019**, *58*, 4963-4967.
- [26] Y. Deng, B. Chi, X. Tian, Z. Cui, E. Liu, Q. Jia, W. Fan, G. Wang, D. Dang, M. Li, K. Zang, J. Luo, Y. Hu, S. Liao, X. Sun, S. Mukerjee, *Journal of Materials Chemistry A* **2019**, *7*, 5020-5030.
- [27] X. Han, Z. Zheng, J. Chen, Y. Xue, H. Li, J. Zheng, Z. Xie, Q. Kuang, L. Zheng, *Nanoscale* **2019**.
- [28] X. Wang, H. Zhang, H. Lin, S. Gupta, C. Wang, Z. Tao, H. Fu, T. Wang, J. Zheng, G. Wu, X. Li, *Nano Energy* **2016**, *25*, 110-119.
- [29] Z. Zhang, M. Dou, H. Liu, L. Dai, F. Wang, *Small* **2016**, *12*, 4193-4199.
- [30] M.-Q. Wang, W.-H. Yang, H.-H. Wang, C. Chen, Z.-Y. Zhou, S.-G. Sun, *ACS Catalysis* **2014**, *4*, 3928-3936.
- [31] F. L. Meng, Z. L. Wang, H. X. Zhong, J. Wang, J. M. Yan, X. B. Zhang, *Adv Mater* **2016**, *28*, 7948-7955.
- [32] Z. Tan, H. Li, Q. Feng, L. Jiang, H. Pan, Z. Huang, Q. Zhou, H. Zhou, S. Ma, Y. Kuang, *Journal of Materials Chemistry A* **2019**, *7*, 1607-1615.
- [33] Q. Wang, Z.-Y. Zhou, Y.-J. Lai, Y. You, J.-G. Liu, X.-L. Wu, E. Terefe, C. Chen, L. Song, M. Rauf, N. Tian, S.-G. Sun, *Journal of the American Chemical Society* **2014**, *136*, 10882-10885.
- [34] W. Yu-Cheng, L. Yu-Jiao, S. Lin, Z. Zhi-You, L. Jian-Guo, W. Qiang, Y. Xiao-Dong, C. Chi, S. Wei, Z. Yan-Ping, *Angewandte Chemie* **2015**, *54*, 9907-9910.
- [35] S. Yasuda, A. Furuya, Y. Uchibori, J. Kim, K. Murakoshi, *Advanced Functional Materials* **2016**, *26*, 738-744.

[36] J.-C. Li, M. Cheng, T. Li, L. Ma, X. Ruan, D. Liu, H.-M. Cheng, C. Liu, D. Du, Z. Wei, Y. Lin, M. Shao, *Journal of Materials Chemistry A* **2019**, *7*, 14478-14482.
